# Supplementary material for: Sucrosomial® Iron: An Updated Review of Its Clinical Efficacy for the Treatment of Iron Deficiency
Source: MDPI journal article supplement (doi:10.3390/ph16060847), 2023-06-06
Supplement: s1 [file s1]

**Table S1. Sucrosomial iron (SI) administration in oncologic patients (11 studies, 294 patients)**

| Author (year)[Ref]<br>Study type           | Patients                                         | Treatment Compound (Dose)<br>Duration                                                   | Baseline Hb (g/dL) | Final Hb (g/dL) | Baseline Ferritin (ng/mL) | Final Ferritin (ng/mL) | Baseline TSAT (%) | Final TSAT (%) | GI side effects             |
|--------------------------------------------|--------------------------------------------------|-----------------------------------------------------------------------------------------|--------------------|-----------------|---------------------------|------------------------|-------------------|----------------|-----------------------------|
| Renso et al (2015)[1]<br>Case series       | 21 patients with lymphoproliferative disease     | SI (30 mg/day) +DEPO 150 mcg/week<br>Chemotherapy<br>2 months                           | 10.1               | 10.9            | ---                       | ---                    | ---               | ----           | 4%                          |
| Petrungaro et al. (2015)[2]<br>Case series | 10 patients with lymphoma (4 HL,6NHL)            | SI (30 mg/day)<br>After chemotherapy<br>2 months                                        | 10.0               | 11.2 (↑QoL)     | 43                        | 93                     | ---               | ---            | ?                           |
| Grillone et al. (2016)[3]<br>Case series   | 30 patients with solid tumors                    | SI (30 mg/day)<br>Chemotherapy<br>2 months*                                             | 11.2               | 11.3            |                           |                        |                   |                | 10%                         |
| Romano et al. (2016)[4]<br>Case series     | 25 Hodgkin lymphoma ≥2B                          | SI (30 mg/day)<br>Chemotherapy<br>End of treatment**                                    | 10.2               | 12.8            | 90                        | 277                    | 14.3              | 35.9           | No                          |
| Sabbatini et al (2017)[5]<br>Case series   | 30 patients with solid tumors                    | SI (30 mg/day) (n=15)<br>SI (60 mg/day) (n=15)<br>3 months**                            | 10.5<br>9.8        | 12.0<br>12.0    | ---                       | ---                    | ---               | ---            | Some dyspepsia and diarrhea |
| Poyato et al. (2017)[6]<br>Case series     | 9 patients with solid tumors                     | SI (30 mg/day)<br>Chemotherapy<br>2 months***                                           | 9.8                | 10.7            | ?                         | ?                      | ?                 | ?              | 11%                         |
| Monari et al (2016)[7]<br>Observational    | 15 Advanced prostate cancer with bone metastases | SI (30mg/day) (n=7)<br>No iron (n=8)<br>Chemoradiotherapy<br>6 months                   | 11.1<br>10.9       | 12.2<br>9.7     | ---                       | ---                    | ---               | ---            | ?<br>Well tolerated         |
| Barragans et al. (2016)[8]<br>RCT pilot    | 15 patients with peritoneal carcinomatosis       | SI (30mg/day) (n=8)<br>FS (80 mg/day) (n=7)<br>3 months                                 | 10.4<br>9.5        | 12.5<br>11.9    | 529<br>1048               | ---                    | 10<br>8           | ---            | 25% mild<br>29% mild        |
| Barzaghi et al. (2016)[9]<br>Observational | 15 patients advanced rectal cancer & bleeding    | SI (30 mg/day) (n=11)<br>IV iron + folic acid (n=4)<br>21 days                          | 8.0                | 11.4<br>11.6    | 100                       | ---                    | 25                | ---            | No                          |
| Mafodda et al (2017)[10]<br>RCT pilot      | 64 patients with solid tumor                     | SI (30 mg/day) +DEPO 500 mcg/3 w<br>FG (125 mg/wk)+ DEPO 500 mcg/3 weeks<br>2 months*** | 9.4<br>9.2         | 12.7<br>12.9    | ---                       | ---                    | ---               | ---            | 3%<br>0%                    |
| Zuccarini A et al (2022)[11]<br>RCT        | 60 patients with chemotherapy-induced anemia     | SI (30 mg/day) +ESA weekly for 12w<br>Control ESA weekly for 12w                        | 9.5<br>9.2         | 52%#<br>31%     | ---                       | ----                   | ----              | ----           | No                          |

\*2 patients started ESA; \*\*No ESA or blood transfusion during study period, 70% reached delta Hb ≥2 g/dL or Hb ≥12 g/dL; \*\*\* one patient transfused. #% of patients attaining the haematological response, defined as a 2g/dL increase in Hb or Hb >12 g/dL. DEPO, darbepoetin; ESA, erythropoiesis stimulating agent; FG, ferric gluconate; FS, ferrous sulfate. RCT, randomized control trial.

## References

1. Renso R, Bolis S, Casaroli I, et al. Use of darbopoietin and oral liposomal iron (Sideral Forte) in chemotherapy associated anemia in patients with lymphoproliferative disease. Expert Review of Hematology, 2015; 8 (Suppl 1):S24
2. Petrungaro A, Mineo G, Cingari R, et al. Benefits assessment of liposomal iron (Sideral Forte) administration to hematologic patients in follow-up after chemotherapy. Expert Review of Hematology, 2015; 8 (Suppl 1):S18-S19
3. Grillone F, Gualteri S, Ventura M, et al. Efficacy and tolerability of Sucrosomial® Iron in elderly ( $\geq 75$  years) patients with solid tumors treated with anticancer agents: a retrospective analysis. Expert Review of Hematology, 2016; 9 (Suppl 1): 28.
4. Romano A, Conticello C, Motta G, et al. Oral Sucrosomial® Iron supplementation in patients affected by Hodgkin lymphoma with mild anemia before chemotherapy: an observational study. Expert Review of Hematology, 2016; 9 (Suppl 1): 30-31.
5. Sabbatini G, Bonfitto F. Effectiveness of two different dosage regimes of Sideral® forte in anemic patients with solid tumor. Expert Review of Hematology, 2017; 10 (Suppl 1): 24-25.
6. Poyato E, Villacé P, Pujades C, et al. Safety and efficacy of Sucrosomial® iron in cancer patients with anemia. Expert Review of Hematology, 2017; 10 (Suppl 1): 26-27.
7. Monari F, Morgantini AG, Frezza G, et al. Oral Sucrosomial® Iron (Sideral® Forte) supplementation in patients with advanced prostate cancer and bone metastasis treated with 223 radium dichloride. Expert Review of Hematology, 2016; 9 (Suppl 1): 24-25.
8. Barragans M, Cambor M, Cuerda C, et al. Sucrosomial® Iron versus ferrous sulfate for anemia in patients undergoing peritoneal carcinomatosis with cytoreductive surgery and hyperthermic intraperitoneal chemotherapy. Expert Review of Hematology, 2016; 9 (Suppl 1): 22-23.
9. Barzaghi D, Cristiano O, Rlmo M, Guida C. Sucrosomial® Iron and radiotherapy in the neoadjuvant treatment of rectal cancers. Good news for patients? Expert Review of Hematology, 2016; 9 (Suppl 1): 26-27.
10. Mafodda A, Giuffrida D, Prestifilippo A, Azzarello D, Giannicola R, et al. Oral Sucrosomial® iron versus intravenous iron in anemic cancer patients without iron deficiency receiving darbepoetin alfa: A pilot study. Support. Care Cancer. 2017; 25: 2779–2786.
11. Zuccarini A, Cicognini D, Tancredi R, Ferrari A, Rizzo G, Lasagna A, et al. Randomized trial of sucrosomial iron supplementation in patients with chemotherapy-related anemia treated with ESA. Support Care Cancer 2022; 30:7645-7653.

**Table S2. Sucrosomial iron (SI) administration in patients with chronic kidney disease (CKD) (12 studies, 378 patients)**

| Author (year)[Ref]<br>Study type                              | Patients                                                     | Treatment<br>Compound (Dose)<br>Duration                                      | Baseline<br>Hb<br>(g/dL) | Final<br>Hb<br>(g/dL) | Baseline<br>Ferritin<br>(ng/mL) | Final<br>Ferritin<br>(ng/mL) | Baseline<br>TSAT<br>(%) | Final<br>TSAT<br>(%) | GI<br>side<br>effects |
|---------------------------------------------------------------|--------------------------------------------------------------|-------------------------------------------------------------------------------|--------------------------|-----------------------|---------------------------------|------------------------------|-------------------------|----------------------|-----------------------|
| <b><i>Non-dialysis chronic kidney disease (ND-CKD)</i></b>    |                                                              |                                                                               |                          |                       |                                 |                              |                         |                      |                       |
| Pisani et al<br>(2014)[1]<br>RCT                              | 99 ND-CKD3-5                                                 | SI (30 mg/day) (n=66)<br>FG (125 mg/week, TID:1000mg) (n=33)<br>3 months      | 10.8<br>10.7             | 11.4<br>11.7          | 71<br>68                        | 86<br>239                    | 16.5<br>17.0            | 18.3<br>21.5         | 12%<br>18%            |
| Moussa-Abdi et al<br>(2015)[2]<br>Observational               | 28 ND-CKD                                                    | SI (60/mg/day) (n=14)*<br>FS (100 mg/day) (n=14)<br>3 months                  | 11.2<br>11.3             | 11.7<br>11.4          | 78<br>182                       | 90<br>228                    | 17.9<br>22.3            | 22.4<br>31.8         | 14%<br>58%            |
| Equitani et al.<br>(2016)[3]<br>Observational                 | 16 ND-CKD<br>Severe anemia                                   | SI (60/mg/day)+ ESA (n=8)<br>No iron + ESA (n=8)<br>3 months                  | 8.6<br>8.9               | 12.6<br>11.4          | 12<br>21                        | 68<br>21                     | 24<br>28                | 39<br>19             | No                    |
| Cuzzola et al.<br>(2016)[4]<br>Case series                    | 35 ND-CKD<br>Intolerant<br>to FS                             | SI (30 mg/day)<br>3 months                                                    | 9.3                      | 11.1                  | ---                             | ---                          | 11.2                    | 8.9                  | No                    |
| Dimikovic et al.<br>(2018)[5]<br>Case series                  | 31 ND-CKD3-4                                                 | SI (30 mg/day)<br>ESA (no change in dosage)<br>6 months                       | 10.2                     | 10.3                  | 213                             | 169                          | 26.8                    | 24.4                 | Mild <sup>###</sup>   |
| Arenas et al.<br>(2016)[6]<br>Case series                     | 24 ND-CKD3-4                                                 | SI (30 mg/day)<br>6 months                                                    | 11.1                     | 12.8                  | 34                              | 75                           | 13.8                    | 26.1                 | No                    |
| Givreas et al.<br>(2018)[7]<br>Case series                    | 40 ND-CKD3-5                                                 | SI (30 mg/day)<br>24 months                                                   | 11.6                     | 12                    | 74                              | 66                           | ---                     | ---                  | No                    |
| Montagud et al.<br>(2020)[8]<br>Case series                   | 37 ND-CKD3<br>71% intolerant<br>to conventional oral<br>iron | SI (30 mg/day)<br>12 months                                                   | 12.0                     | 11.9                  | 100                             | 116                          | 17.0                    | 18.7                 | 3%                    |
| <b><i>Chronic kidney disease on hemodialysis (HD-CKD)</i></b> |                                                              |                                                                               |                          |                       |                                 |                              |                         |                      |                       |
| Panichi et al.<br>(2015)[9]<br>RCT pilot                      | 12 HD-CKD                                                    | SI (30-180 mg/week)<br>FG (30-180 mg/week)<br>3 months                        | 12.7<br>12.0             | 12.7<br>12.6          | ---<br>---                      | ---<br>---                   | 24.0<br>27.6            | 21.0<br>30.8         | No                    |
| Pistoni et al.<br>(2016)[10]<br>RCT pilot                     | 22 HD-CKD                                                    | SI (360 mg/week)+ESA (n=13)**<br>FG (16-190 mg/week)+ESA (n=9)***<br>3 months | 10.7<br>11.1             | 11.4<br>11.4          | 312<br>285                      | 177<br>250                   | 21.6<br>18.6            | 20<br>15.7           | ?                     |

|                                           |           |                                                                           |      |      |      |     |      |      |    |
|-------------------------------------------|-----------|---------------------------------------------------------------------------|------|------|------|-----|------|------|----|
| Manca et al. (2017)[11]                   | 10 HD-CKD | Switched from FG (31.2 to 125 mg/week) to SI (30 mg/day) 15 months        | 12.2 | 11.8 | 1705 | 587 | 49.5 | 32.7 | No |
| Reggiani et al. (2022)[12]<br>Case series | 24 HD-CKD | Switched from FG (62.5 mg/week) to SI (90 mg/week) <sup>##</sup> 3 months | 11.2 | 11.0 | 225  | 97  | 30   | 17   | 4% |

FG, ferric gluconate; ESA, erythropoiesis stimulating agent; EPO, erythropoietin; RCT, randomized control trial; TSAT, transferrin saturation index; GI, gastro-intestinal.

\*Need for EPO 36% with SI vs. 57% with FS.

\*\*EPO dose decreased by 2000 IU/week in 38% and increased in 23% of SI patients.

\*\*\*EPO dose increased by 2000 IU/week in 67% and decreased in 11% of FG patients.

<sup>##</sup>EPO dose increased by 2000 IU/week.

<sup>###</sup>More frequently mild dyspeptic symptom and less frequently constipation.

## References:

1. Pisani A, Riccio E, Sabbatini M, Andreucci M, Del Rio A, et al. Effect of oral liposomal iron versus intravenous iron for treatment of iron deficiency anaemia in CKD patients: A randomized trial. *Nephrol. Dial. Transplant.* 2015; 30: 645–652.
2. Moussa-Abdi F, Alvarado de Beas F, Velasco –Pilar R, et al. Hierro liposómico oral en ERCA. Experiencia con dos dosis diarias y comparación con sulfato ferroso (P.188). *Nefrología* 2015; 35 (suppl 1):54.
3. Equitani F. Erythropoietin (EPO) plus oral Sucrosomial® Iron versus EPO alone for the treatment of severe anemia in no end-stage chronic kidney disease. *Expert Review of Hematology* 2016; 9 (Suppl 1): 35-36.
4. Cuzzola C, Mancini A, Giancaspro V. Anemia in chronic kidney disease patients: comparison between Sucrosomial® iron and ferrous sulfate. *Expert Review of Hematology* 2016; 9 (Suppl 1): 33.
5. Dimkovic N, Maslarevic Radovic V, Jankovic A, et al. Is liposomal iron good alternative over IV iron for maintenance therapy in CKD patients [SP319]. *Nephrology Dialysis Transplantation* 2016; 31 (Suppl 1): i193–i199,
6. Arenas MD, Herrera AC, Chacón A, Alzate E. Efficacy, tolerance, and adherence to treatment with Sucrosomial® Iron in patients with chronic kidney disease stages 3–4 and iron deficiency. *Expert Review of Hematology* 2016; 9 (Suppl 1): 34-35.
7. Montagud-Marrahia E, Arrizabalaga P, Abellanab R, Pocha E. Liposomal iron in moderate chronic kidney disease. *Nefrología* 2020; 40: 446-452.
8. Griveas I. Efficacy and tolerability of oral Sucrosomial® iron in CKD patients with anemia. *Expert Review of Hematology* 2017; 10 (Suppl 1): 8-10.
9. Panichi V, Scatena A, Digiorgio A, Paoletti S. A randomized trial investigating the effects of oral liposomal iron (Sideral Forte) versus intravenous iron gluconate in CKD hemodialysis patients. *Expert Review of Hematology* 2015;8 (Suppl 1):19
10. Pistoni G, Di Martino M, Veziano E, Saffioti S. Effectiveness of Sucrosomial® Iron (Sideral® Forte) in dialysis patients in therapy with intravenous iron and erythropoietin (EPO). 57<sup>o</sup> Congresso Nazionale Società Italiana di Nefrologia, Milano, October 2016.
11. Manca ML, S Mura S, Solinas R, Di Lauro L. Effects of substitution of intravenous iron therapy with oral sucrosomial® pyrophosphate iron in HD-CKD patients with hyperferritinemia – Results at 15 months. *Expert Review of Hematology* 2017: 10 S1
12. Reggiani F, Colombo G, Astori E, Landoni L, Finazzi S, Milzani A, et al. Preliminary experience on the use of sucrosomial iron in hemodialysis: focus on safety, hemoglobin maintenance and oxidative stress. *Int Urol Nephrol* 2022;54:1145-1153. doi: 10.1007/s11255-021-02983-8.

**Table S3. Sucrosomial iron (SI) administration in patients with gastrointestinal disease (10 studies, 363 patients)**

| Author<br>(year) [ref]<br>Study type          | Patients                                                | Treatment<br>Compound (Dose)<br>Duration                                                            | Baseline<br>Hb<br>(g/dL) | Final<br>Hb<br>(g/dL) | Baseline<br>Ferritin<br>(ng/mL) | Final<br>Ferritin<br>(ng/mL) | Baseline<br>TSAT<br>(%) | Final<br>TSAT<br>(%) | GI<br>side<br>effects |
|-----------------------------------------------|---------------------------------------------------------|-----------------------------------------------------------------------------------------------------|--------------------------|-----------------------|---------------------------------|------------------------------|-------------------------|----------------------|-----------------------|
| <b><i>Inflammatory Bowel Disease</i></b>      |                                                         |                                                                                                     |                          |                       |                                 |                              |                         |                      |                       |
| Abbati et al.<br>(2019) [1]<br>Case series    | 30 IBD<br>(17 CD, 13UC)<br>Mild anemia                  | SI (30 mg/day)<br>3 months                                                                          | 11.7                     | 12.3                  | 46                              | 45                           | 11                      | 17                   | 13%                   |
| Bastida et al.<br>(2021)[2]<br>Case series    | 46 IBD<br>(31CD; UC, 15CD,<br>intolerant to FS)         | SI (30 mg/day)<br>3 months                                                                          | 11.2                     | 11.7<br>(↑QoL)        | 14                              | 16                           | 9                       | 16                   | 11%                   |
| Indriolo et al.<br>(2014)[3]<br>Observational | 38 IBD<br>Hb >9 g/dL                                    | SI (30 mg/day) (n=13)<br>FS (105 mg/day) (n=14)<br>No iron (n=11)<br>3 months                       | 10.6<br>10.9<br>11.4     | 12.6<br>12.3<br>11.9  | ---                             | ---                          | ---                     | ---                  | No                    |
| Bertani et al.<br>(2021)[4]<br>RCT            | 42 UC<br>Mild-to-moderate<br>anemia                     | SI (60 mg/day, 2 months, plus 30 mg/day, 1<br>month)<br>FCM (1000 mg IV, at baseline)<br>3 months   | 11.1<br>10.3             | 12.2<br>11.8          | 16<br>10                        | 26<br>131*                   | ---                     | ---                  | 5%<br>0%              |
| Stuklov et al.<br>(2020)[5]<br>Case-control   | 77 IBD**<br>(23 CD, 44 UC)                              | SI (60 mg/day) (n=28)<br>IS (913.6 ± 269.6 mg cumulative) (n=22)<br>3 months                        | 10.1<br>10.0             | 12.5<br>11.6          | ---                             | ---                          | ---                     | ---                  | No                    |
| <b><i>Celiac Disease</i></b>                  |                                                         |                                                                                                     |                          |                       |                                 |                              |                         |                      |                       |
| Ragozzino et al<br>(2015)[6]<br>Case series   | 6 Celiac disease<br>28 Non-celiac<br>gluten sensitivity | SI (30 mg/day 15d, 15 mg/day 75d)<br>3 months                                                       | 8.8<br>9.7               | 11.5<br>12.5          | 13<br>18                        | 23<br>29                     | ---                     | ---                  | ---                   |
| Scorsone et al.<br>(2016)[7]<br>Observational | 24 Celiac disease<br>All T1DM                           | SI (30 mg/day) (n=12)<br>FS (105 mg/day) (n=12)<br>1 month                                          | ---                      | +1.27<br>+0.82        | ---                             | ---                          | 19.1<br>17.4            | 23.6<br>18.7         | ---                   |
| Elli L. et al.<br>(2018)[8]<br>Observational  | 43 Celiac disease                                       | SI (30 mg/day) intolerant to FS (n=24)<br>FS (105 mg/day) (n=19)<br>3 months                        | 10.9<br>11.0             | 12.0<br>12.9*         | 11<br>13                        | 18<br>59*                    | 10<br>11                | 15<br>20*            | 9%<br>23%             |
| <b><i>Bariatric surgery</i></b>               |                                                         |                                                                                                     |                          |                       |                                 |                              |                         |                      |                       |
| Ciudín et al.<br>(2018)[9]<br>Case-control    | 40 Bariatric<br>surgery<br>All women                    | SI (28 mg/day) (n=20)<br>IVI (Iron sucrose 300 mg) (n=20)<br>3 months                               | 12.4<br>12.5             | 12.3<br>12.7          | 102<br>98                       | 89<br>96                     | 22.9<br>23.6            | 24.1<br>26.3         | No                    |
| Greco et al.<br>(2023)[10]<br>Case series     | 17 Bariatric<br>surgery                                 | SI (60 mg/day) plus calcium, magnesium,<br>zinc, water-soluble and fat-soluble vitamins<br>3 months | 10.46                    | 10.63                 | 3,5                             | 6.9                          |                         |                      | 50%                   |

CD, Crohn disease; FCM, ferric carboxymaltose; FS, ferrous sulfate; IS, Iron Sucrose; GI, gastro-intestinal; IBD, inflammatory bowel disease; IVI, intravenous iron; RCT, randomized controlled trial; T1DM, type 1 diabetes mellitus; TSAT, transferrin saturation index; UC, ulcerative colitis; (---) not reported. \*  $p < 0.05$  SI vs. FS or FCM/FS; \*\*27 patients was analyzed to determine anemia characteristics

## References

1. Abbati, G.; Incerti, F.; Boarini, C.; Pileri, F.; Bocchi, D.; Ventura, P.; Buzzetti, E.; Pietrangelo, A. Safety and efficacy of sucrosomial iron in inflammatory bowel disease patients with iron deficiency anemia. *Intern. Emerg. Med.* 2018, 14, 423–431.
2. Bastida G, Herrera-de Guise C, Algaba A, Ber Nieto Y, Soares JM, Robles V, et al. Sucrosomial Iron Supplementation for the Treatment of Iron Deficiency Anemia in Inflammatory Bowel Disease Patients Refractory to Oral Iron Treatment. *Nutrients* 2021, 13, 1770. <https://doi.org/10.3390/nu13061770>.
3. Indriolo A, Ravelli P. Comparison between liposomal iron and ferrous sulfate in patients with iron deficiency anemia and inflammatory bowel disease. A pilot controlled study. *J Crohn's Colitis* 2014 Feb;8(Suppl 1):S289.
4. Bertani L, Tricò D, Zanzi F, et al. Oral Sucrosomial Iron is as effective as intravenous ferric carboxy-maltose in treating anemia in patients with ulcerative colitis. *Nutrients* 2021; 13: 608.
5. Stuklov NI, Basiladze IG, Kovalchuk MS, Pivnik AV, Knyazhev OV, Parfenov AI, Tarantino G. New options in management of iron-deficiency syndromes in inflammatory bowel diseases. *EC Gastroenterology and Digestive System* 7.8 (2020): 94-104.
6. Ragozzino g, Riccio A, Mattera E. Effectiveness of oral liposomal iron (Sideral– Forte) in patients with intestinal malabsorption (Celiac disease and gluten sensitivity). *Exp Rev Hematol* 2015; 8 (Suppl 1): 21-22.
7. Scorsone A, Calandrino C, Ferranti R, et al. Iron supplementation with liposomal formulation (Sideral– Forte) in celiac patients with iron deficiency and Type 1 diabetes mellitus. *Exp Rev Hematol* 2015; 8 (Suppl 1): 19-20.
8. Elli L, Ferretti F, Branchi F, Tomba C, Lombardo V, et al. Sucrosomial® iron supplementation in anemic patients with celiac disease not tolerating oral ferrous sulfate: A prospective study. *Nutrients*. 2018; 10: 330.
9. Ciudin A, Simó-Servat O, Balibrea JM, Vilallonga R, Hernandez C, Simó R, Mesa J. Response to oral sucrosomial iron supplementation in patients undergoing bariatric surgery. The BARI-FER study. *Endocrinol. Diabetes Nutr.* 2018, 65, 17–20.
10. Greco F, Pignata G, Marano L. Efficacy of food for special medical purposes (FSMPs) with Sucrosomial minerals (Sideralmed®) in the treatment of vitamins and mineral deficiencies developed after standard oral supplementation following hypoabsorptive bariatric surgery. *Blood Transfus* 2023; 21 (Suppl 1): S25-S26.

**Table S4. Sucrosomial iron (SI) administration in cardiology patients (4 studies, 119 patients)**

| Author<br>(year) [Ref]<br>Study type           | Patients                                                | Treatment<br>Compound (Dose)<br>Duration                             | Baseline<br>Hb<br>(g/dL) | Final<br>Hb<br>(g/dL) | Baseline<br>Ferritin<br>(ng/mL) | Final<br>Ferritin<br>(ng/mL) | Baseline<br>TSAT<br>(%) | Final<br>TSAT<br>(%) | GI<br>side<br>effects |
|------------------------------------------------|---------------------------------------------------------|----------------------------------------------------------------------|--------------------------|-----------------------|---------------------------------|------------------------------|-------------------------|----------------------|-----------------------|
| <b>Heart failure</b>                           |                                                         |                                                                      |                          |                       |                                 |                              |                         |                      |                       |
| Marazia et al<br>(2017)[1]<br>Case series      | 9 patients with<br>CHF<br>(LVEF ≤39%)                   | SI (60 mg/day)*<br>1 month                                           | 10.3                     | 11.0                  | 32                              | 67                           | ---                     | ----                 | ?                     |
| Putorti et al.<br>(2017)[4]<br>Case series     | 10 patients with<br>Hypertensive<br>heart disease       | SI (60 mg/day)<br>5 weeks                                            | 10.5                     | 11.5                  | ---                             | ---                          | ---                     | ---                  | No                    |
| Karavidas et al.<br>(2021)[3]<br>Observational | 50 patients with<br>HFrEF<br>(LVEF 27±5)                | SI (28 mg/day), 3 months (n=25)**                                    | 12.5                     | 12.9                  | 39                              | 67                           | ---                     | ---                  | 4%                    |
|                                                |                                                         | Matched non-treated controls (n=25)<br>Follow-up 3 and 6 months      | 12.9                     | 13.2<br>12.7<br>12.6  | 45                              | 79<br>45<br>44               |                         |                      | ---                   |
| <b>Interventional cardiology</b>               |                                                         |                                                                      |                          |                       |                                 |                              |                         |                      |                       |
| Ruperto et al.<br>(2017)[4]<br>Observational   | 50 patients<br>percutaneous<br>coronary<br>intervention | SI (30 mg/day) (n=25)<br>FS (105 mg/day) (n=25)<br>3 months post-PCI | 8.9<br>9.1               | 11.2<br>11.0          | ---                             | ---                          | ---                     | ---                  | 0%<br>32%             |

CHF, chronic heart failure; LVEF, left ventricular ejection fraction; HFrEF, heart failure with reduced ejection fraction; FS, ferrous sulphate; \*BNP and CRP decreased with treatment; \*\*B-natriuretic peptide (BNP) and C-reactive protein (CRP) decreased with treatment, 6min walking distance (6MWD) increased after treatment, and NYHA (New York Heart Association) class improved.

#### References

1. Marazia S, Loderi S, Magliari F, et al. Sucrosomial® iron supplementation can be a useful support treatment in patients with heart failure and anemia. *Exp Rev Hematol* 2017; 10 (Suppl 1): 33.
2. Putorti G. Benefits of Sucrosomial® oral iron in patients with heart disease and concomitant iron-deficiency anemia. *Exp Rev Hematol* 2017; 10 (Suppl 1): 37.
3. Karavidas A, Troganis E, Lazaros G, Balta D, Karavidas I-N, Polyzogopoulou E, et al. Oral sucrosomial iron improves exercise capacity and quality of life in heart failure with reduced ejection fraction and iron deficiency: a non-randomized, open-label, proof-of-concept study. *Eur J Heart Fail* 2021;23(4):593-597. doi: 10.1002/ejhf.2092.
4. Ruperto C, Ricca G, Antonio AA, et al. Oral Sucrosomial® iron supplementation in patients underwent percutaneous coronary intervention: safety, efficacy and tolerability. *Exp Rev Hematol* 2017; 10 (Suppl 1): 33-34.

**Table S5. Sucrosomial iron (SI) administration in Internal Medicine (10 studies, 468 patients)**

| Author (year) [Ref]<br>Study type              | Patients                                                   | Treatment<br>Compound (Dose)<br>Duration                                                                                        | Baseline<br>Hb<br>(g/dL) | Final<br>Hb<br>(g/dL) | Baseline<br>Ferritin<br>(ng/mL) | Final<br>Ferritin<br>(ng/mL) | Baseline<br>TSAT<br>(%) | Final<br>TSAT<br>(%) | GI<br>side<br>effects |
|------------------------------------------------|------------------------------------------------------------|---------------------------------------------------------------------------------------------------------------------------------|--------------------------|-----------------------|---------------------------------|------------------------------|-------------------------|----------------------|-----------------------|
| Nasuti et al.<br>(2016) [1]<br>Case series     | 30 IDA various<br>origin                                   | SI (60 mg/day)<br>2 months                                                                                                      | 9.8                      | 12.0                  | ---                             | ---                          | ---                     | ---                  | 10%                   |
| Campanella et al<br>(2015) [2]<br>Case series  | 16 IDA various<br>origin                                   | SI (30 mg/day) 40 days (n=8)<br>SI (30 mg/day) 60 days (n=8)                                                                    | 10.3<br>10.8             | 11.9<br>12.6          | <20<br><20                      | ---                          | ---                     | ---                  | No                    |
| Scifo et al<br>(2015) [3]<br>Case series       | 9 haemorrhoidal<br>disease with IDA                        | SI (60 mg/day)<br>3 months                                                                                                      | 9.4                      | 10.8                  | 10                              | 80                           | 18                      | 34                   | No                    |
| Giordano et al.<br>(2016) [4]<br>Observational | 21 women with<br>inflammatory<br>anemia                    | SI (60 mg/day) (n=9)<br>FS (210 mg/day) (n=12)<br>3 months                                                                      | 8.5<br>9.0               | 11.5<br>9.5           | 100<br>120                      | 260<br>100                   | <20<br><20              | ---                  | 0%<br>42%             |
| Parisi et al.<br>(2016) [5]<br>Observational   | 43 patients with<br>systemic sclerosis                     | SI (60 mg/day) (n=21)*<br>FS (105 mg/day) (n=22)<br>3 months                                                                    | 10.2<br>10.7             | 13.4<br>11.9          | 130<br>110                      | 240<br>150                   | ---                     | ---                  | 0%<br>23%             |
| Bellodi et al.<br>(2016) [6]<br>Observational  | 82 patients with<br>IDA                                    | SI (30 mg/day)<br>FG or FCM (500 mg) + SI (30 mg/day)<br>6-7 months                                                             | 10.3<br>8.8              | 11.6<br>12.2          | 7.5<br>5                        | 27.5<br>27                   | ---                     | ---                  | No<br>3.7%            |
| Vallerio et al.<br>(2016) [7]<br>Case series   | 8 patientis with<br>Hepatitis C-<br>related cirrhosis      | SI (60 mg/day)**                                                                                                                | 9.4                      | 10.1                  | 10                              | 36                           | 19                      | 24                   | No                    |
| Marchitto et al.<br>(2018) [8]<br>Case series  | 43 elderly with<br>IDA                                     | SI (30 mg/day)<br>FG (62.5 mg)<br>1 month                                                                                       | 10.5<br>8.9              | 11.9<br>9.9           | ---                             | ---                          | ---                     | ---                  | ---                   |
| Giordano et al.<br>(2019) [9]<br>RCT           | 135 patients with<br>MSD and low-risk<br>refractory anemia | SI (28mg/day) + EPO (n=54) (10.5 w)***<br>FG (62.5 mg/week)+ EPO (n=43) (12 w)***<br>No iron + EPO (n=38) (12 w)***<br>3 months | 8.9<br>9.3<br>9.7        | 12.0<br>12.0<br>12.0  | 610.2<br>608.8<br>699.5         | 607.0#<br>723.7#<br>730.3#   | ---                     | 32#<br>48#<br>40#    | No                    |
| Giordano et al.<br>(2021) [10]<br>RCT          | 90 patient with<br>IDA due to<br>bleeding                  | SI (120 mg/day) (n=45)<br>FG (62.5 mg/day to cover TID) (n=45) (3.5<br>w)***<br>4 weeks \$                                      | 8.5<br>8.2               | 12.0<br>12.0          | 5<br>7                          | 260##<br>18##                | ---                     | ---                  | 36%<br>22%###         |

EPO, epoetin.alfa; FCM, ferric carboxymaltose; FG, ferric gluconate; IDA, iron deficiency anemia; MSD, myelodysplastic syndrome; TID, total iron deficit. \* SI treatment reduced ESR and CRP levels; \*\*Reduction of aortic stiffness;\*\*\* weeks median to achieve Hb 12 g/dL; #Ferritin/TSAT after 1 month; ## 12 months after enrollment; ###5 urticaria and headache and 5 hypotension; \$ Cost 120 €/month for SI, 300 €/month for FG.



## References

1. Nasuti A, Sagristani M, Sessa F. Oral sucrosomial® iron (Sideral® forte) is effective and well tolerated in elderly patients affected by iron deficiency anemia of various origin. *Exp Rev Hematol*, 2016; 9 (Suppl 1): S38-S39.
2. Campanella MP, Ebbli A, Gaibazzi D, et al. Effectiveness and compliance of oral liposomal iron (Sideral Forte) treatment for iron deficiency anemia: a valid alternative to iv iron therapies. *Exp Rev Hematol* 2015; 8 (Suppl 1): S31-S32.
3. Scifo M. Liposomal iron and ascorbic acid (Sideral Forte) supplementation in the treatment of iron deficiency anemia in patients with hemorrhoidal disease. *Exp Rev Hematol* 2015; 8 (Suppl 1): S21.
4. Giordano, G. Reduction of inflammatory markers with liposomal iron (Sideral®). Pre-clinical and clinical results. *Exp. Rev. Hematol.* 2016; 9 (Suppl. S1): S17.
5. Parisi S, Bruzzzone M, Scarati M et al. Efficacy of Sucrosomial® Iron (Sideral® Forte) in the treatment of anemia in patients affected by systemic sclerosis. *Exp Rev Hematol*, 2016; 9 (Suppl 1): S21-S22.
6. Bellodi A, Molinari E, Genova C, et al. Retrospective evaluation of iron deficiency patients in a Northwestern Italy anemia ambulatory: experience with Sucrosomial® Iron. *Exp Rev Hematol* 2016; 9 (Suppl 1): S29.
7. Vallerio P, Stucchi M, Sirico D, Buono A, Rinaldi, Palazzina M, Giannattasio C. Sucrosomial® iron and aortic stiffness in cirrhotic patients. *Exp Rev Hematol*, 2016; 9 (Suppl 1): S42.
8. N. Marchitto, F. Sindona, M. Marcinnò, D. Marino, G. Z. Alexandru, F. Costanzo, S. G. Dalmaso, G. Raimondi. Role of administration of oral Sucrosomial® Iron and intravenous ferric gluconate in patients with secondary anaemia: effects on haemoglobin values and cardiovascular risk. *Blood Transfus* 2019; 17 (Suppl 1): S21.
9. Giordano G, Cutuli MA, Lucchesi A, Magnifico I, Venditti N, Vergalito F, Gasperi M, Di Marco R. Iron Support in Erythropoietin Treatment in Myelodysplastic Syndrome Patients Affected by Low-Risk Refractory Anaemia: Real-Life Evidence from an Italian Setting. *Acta Haematol.* 2020;143:155-162.
10. Giordano G, Napolitano M, Di Battista V, Luchessi D. Oral high-dose Sucrosomial® Iron vs. intravenous iron in sideropenic anemia intolerant/refractory to iron sulfate. Multicentric randomized study. *Ann Hematol.* 2021; 100: 2173-2176.

**Table 6S. Sucrosomial iron (SI) administration in Patient Blood Management (9 studies, 1559 patients)**

| Author<br>(year)[Ref]<br>Study type            | Patients                                                                | Treatment<br>Compound (Dose)<br>Duration                                                                               | Baseline<br>Hb<br>(g/dL) | Final<br>Hb<br>(g/dL)             | Baseline<br>Ferritin<br>(ng/mL) | Final<br>Ferritin<br>(ng/mL) | ABT<br>rate<br>(%)    | LOS<br>(days) | GI<br>side<br>effects |
|------------------------------------------------|-------------------------------------------------------------------------|------------------------------------------------------------------------------------------------------------------------|--------------------------|-----------------------------------|---------------------------------|------------------------------|-----------------------|---------------|-----------------------|
| <b>Cardiac surgery</b>                         |                                                                         |                                                                                                                        |                          |                                   |                                 |                              |                       |               |                       |
| Testa et al.<br>(2017)[1]<br>Case series       | 28 patients<br>postoperative                                            | SI (30 mg/day, months 1 and 3) <sup>b</sup><br>3 months                                                                | 10.0                     | 12.4                              | 334                             | 63                           | ---                   | ---           | No?                   |
| Grossi et al.<br>(2017)[2]<br>Case series      | 16 patients<br>postoperative                                            | SI (120 mg/day, 7 days from POD7; n=8) <sup>c</sup><br>SI (60 mg/day, 14 days from POD7; n=8) <sup>c</sup><br>1-2 week | 9.7<br>10.0              | 10.4<br>11.0                      | ---                             | ---                          | ---                   | ---           | No                    |
| Buioni et al.<br>(2017)[3]<br>Case series      | 22 patients<br>postoperative                                            | SI (120 mg/day)<br>3 weeks                                                                                             | 10.0                     | 12.0                              | ---                             | ---                          | ---                   | 0             | No                    |
| Pierelli et al.<br>(2021)[4]<br>RCT            | 1000 patients<br>preoperative                                           | SI (60 mg/day, 30 days; n=500)<br>Control (standard preparation; n=500)                                                | ---                      | 13.9<br>13.3                      | ---                             | 184<br>160                   | 65 <sup>a</sup><br>35 | 13<br>15      | 1.8%<br>---           |
| Pagliani et al.<br>(2017)[5]<br>Observational  | 16 patients<br>postoperative                                            | SI (60 -120 mg/day) (n=8)<br>FS (105 mg/day) (n=8)<br>14 days                                                          | 9.5<br>9.2               | 10.1<br>9.9                       | 500<br>600                      | 400<br>870                   | ---                   | ---           | 0%<br>33%             |
| Venturini et al.<br>(2022)[6]<br>Observational | 106 patients<br>postoperative                                           | SI (120 mg/day, 10 days + 30 mg/day, 10<br>days; n=54)<br>FCM (1000 mg IV, single dose; n=52)                          | 10.1<br>10.1             | 12.0<br>12.5                      | 411<br>386                      | 220<br>689                   | ---                   | ---           | No<br>No              |
| <b>Vascular surgery</b>                        |                                                                         |                                                                                                                        |                          |                                   |                                 |                              |                       |               |                       |
| Lucertini et al.<br>(2020)[7]<br>RCT           | 51 patients<br>AAAR<br>Postoperative                                    | SI (30 mg/day, 30 days; starting PO10;<br>n=26)<br>Control (no iron; n=25)                                             | 9.3<br>9.3               | 11.2<br>9.7                       | ---                             | ---                          | 0<br>0                | ---           | No                    |
| <b>Orthopedic surgery</b>                      |                                                                         |                                                                                                                        |                          |                                   |                                 |                              |                       |               |                       |
| Di Costanzo<br>(2017)[8]<br>Observational      | 20 THR<br>preoperative                                                  | SI (30 mg/day, for 30 days; n=10)<br>Control (No iron; n=10)                                                           | 10.5<br>12               | 11.5 <sup>e</sup><br>12           |                                 |                              | 0<br>40               |               |                       |
| Scardino et al.<br>(2019)[9]<br>Observational  | 100 THR ID <sup>e</sup><br>100 THR ID<br>100 THR non-ID<br>preoperative | No iron<br>SI (30 mg/day, for 3-4 weeks)<br>No iron<br>All received tranexamic acid (1 g)                              | 13.5<br>13.5<br>14.8     | 10.2 <sup>f</sup><br>13.3<br>12.8 | 66<br>65<br>160                 | ---                          | 7<br>0<br>0           | 6.5<br>4<br>4 | ---<br>No<br>---      |

AAAR, abdominal aortic aneurysm repair; FCM, ferric carboxymaltose; FS, ferrous sulphate; ID, iron deficiency; RCT, randomized control trial; THR, total hip replacement. <sup>a</sup> Compared to control, SI treatment resulted in reduced transfusion rate (35% vs. 65%, respectively; p<0.001) and transfusion index (0.95 units/pt vs. 2.03 units/pt, respectively; p>0.001). <sup>b</sup>6MWD increased and BNP decreased after treatment. <sup>c</sup>6MWD increased after treatment. <sup>d</sup>ID defined by ferritin < 100 ng/mL, or ferritin levels > 100 ng/mL but C-reactive protein > 3 mg/L and transferrin saturation (TSAT) <20%. <sup>e</sup>Postop Hb 8.5 g/dL and 7.5 g/dL, for SI and control, respectively. <sup>f</sup>Final Hb was measured at POD30; SI administration resulted in cost saving 1763 €/pt, ID-SI vs. ID-no iron

## References

1. Testa R, Venturini E, Sansoni C, et al. Oral Sucrosomial® Iron in post cardiac surgery patients. Efficacy and tolerability in a follow up of 3 months. *Exp Rev Hematol* 2017; 10 (Suppl 1): 12-13.
2. Grossi A, Baldari F, Codraro S, et al. Sucrosomial® iron: short-term efficacy compared to administration of 4 capsules/day for 7 days vs. 2 capsules/day for 14 days in post cardiac surgery patients for myocardial revascularization. *Exp Rev Hematol* 2017; 10 (Suppl 1): 31.
3. Buioni D, Nardella S, Maselli D. Effect of Sucrosomial® iron in early time after cardiac surgery. *Exp Rev Hematol* 2017; 10 (Suppl 1): 36-37.
4. Pierelli L, De Rosa A, Falco M, et al. preoperative Sucrosomial iron supplementation increases haemoglobin and reduces transfusion requirements in elective heart surgery patients: A prospective randomized study. *Surg Technol Int* 2021; 39:321-8.
5. Pagliani L, Payadattil S, Marigo L, et al. Hospital protocol for evaluating effectiveness and timing of use of Sucrosomial® iron in cardiac rehabilitation departments. *Exp Rev Hematol* 2017; 10 (Suppl 1): 35-36.
6. Venturini E, Masini G, Giallauria F. Short-term treatment of iron deficiency anemia after cardiac surgery. *Int J Cardiol Heart Vasc* 2022; 40:101038.
7. Lucertini G, Gazzola V, Boschetti GA, Khourieh T. Sucrosomial iron in the postoperative period after abdominal aortic aneurism repair. *Blood Transfus* 2020; 18 (Suppl 1): s25.
8. Di costanzo. Effectiveness of oral Sucrosomial iron (Sideral Forte) administration in patients undergoing hip replacement. *Exp Rev Hematol* 2017; 10 (Suppl 1): 15-16.
9. Scardino M, Di Matteo B, Martorelli F, Tanzi D, Kon E, D'Amato T. Improved patient blood management and cost saving in hip replacement surgery through the implementation of pre-operative Sucrosomial® iron supplementation: a quality improvement assessment study. *Inter Orthop* 2019; 43:39-46.
